# Supplementary material
Source: PubMed Central journal article supplement (PMC7035608)
Supplement: pnas.1907921117.sapp.pdf [file pnas.1907921117.sapp.pdf]

## Supplementary Information for

### **Glioblastomas exploit truncated *O*-linked glycans for local and distant immune modulation via the macrophage galactose-type lectin**

Sophie A. Dusoswa<sup>a,b</sup>, Jan Verhoeff<sup>a,1</sup>, Erik Abels<sup>c,1</sup>, Santiago P. Méndez-Huergo<sup>d</sup>, Diego O. Croci<sup>d,e</sup>, Lisan H. Kuijper<sup>a</sup>, Elena de Miguel<sup>a</sup>, Valerie M.C.J. Wouters<sup>a</sup>, Myron G. Best<sup>b, f</sup>, Ernesto Rodriguez<sup>a</sup>, Lenneke A.M. Cornelissen<sup>a</sup>, Sandra J. van Vliet<sup>a</sup>, Pieter Wesseling<sup>f</sup>, Xandra O. Breakefield<sup>c</sup>, David P. Noske<sup>b</sup>, Thomas Würdinger<sup>b, c</sup>, Marike L.D. Broekman<sup>c, g, h</sup>, Gabriel A. Rabinovich<sup>d, i, 2</sup>, Yvette van Kooyk<sup>a</sup>, Juan J. Garcia-Vallejo<sup>a, 2</sup>.

Juan J. Garcia-Vallejo  
E-mail: [jj.garciavallejo@amsterdamumc.nl](mailto:jj.garciavallejo@amsterdamumc.nl)

Gabriel A. Rabinovich  
Email: [gabyrabi@gmail.com](mailto:gabyrabi@gmail.com)

#### **This PDF file includes:**

Supplementary text  
Figs. S1 to S8  
Tables S1 to S2

#### **Other supplementary materials for this manuscript include the following:**

Datasets S1

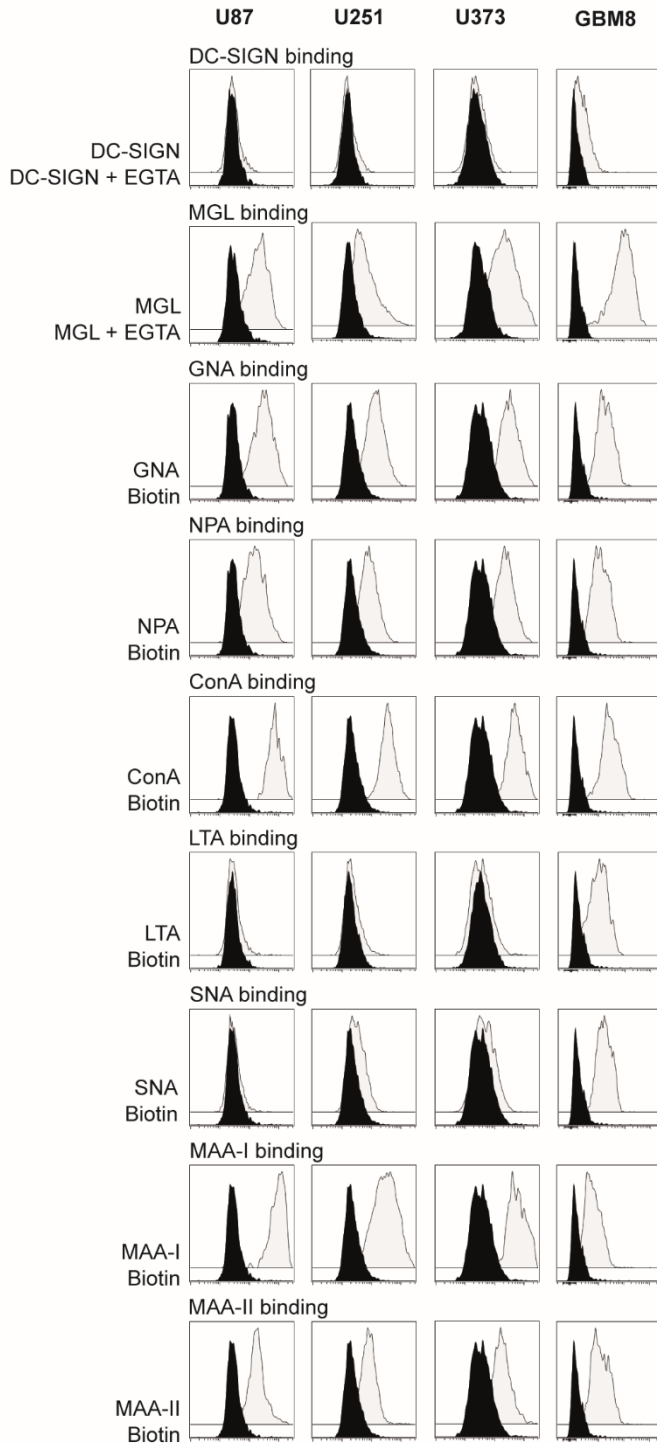

**Fig. S1. Lectin binding screen.** Overlaid histograms, representative for N=3, showing lectin binding versus a negative controls which include added EGTA in the case of the human lectins DC-SIGN and MGL to prevent calcium dependent binding and the secondary only control (AlexaFluor488/labelled streptavidin) for the other lectins.

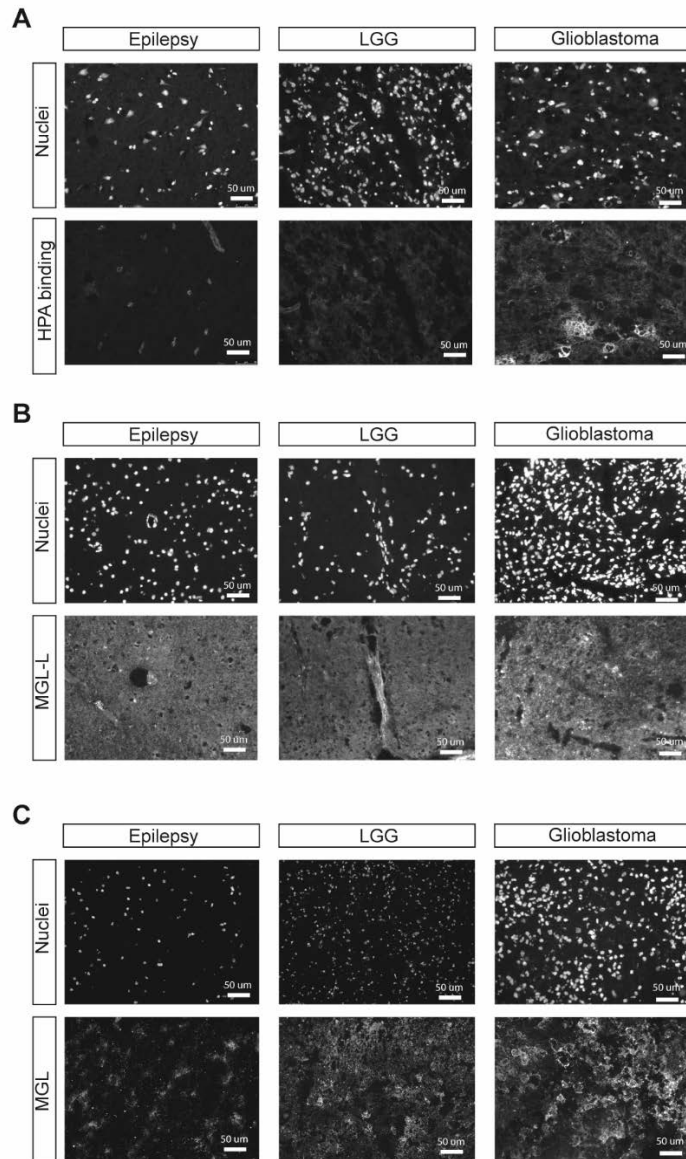

**Fig. S2. Immunofluorescence single channels.** Seven  $\mu\text{m}$  cryosections of surgical epilepsy, LGG, and glioblastoma (GBM) samples, representative for 5 patients per condition, stained with **a.** HPA (green) and Hoechst as nuclear counterstain (blue), **b.** MGL-mouseFc (red) and Hoechst as nuclear counterstain (blue), and **c.** the MGL receptor (yellow) and nuclei (blue).

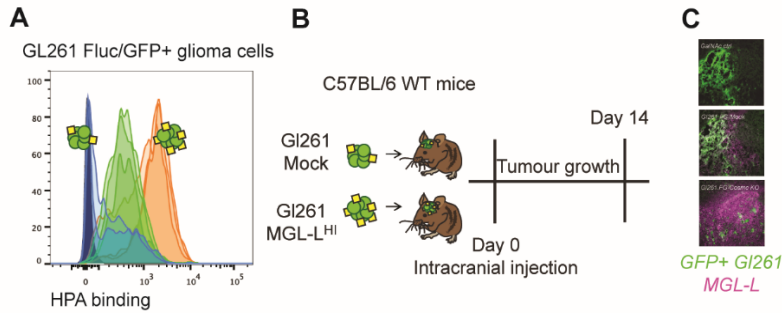

**Fig. S3. Murine model for MGL-L<sup>Hi</sup> glioblastoma.** **a.** Expression of immature *O*-linked glycans on MGL-L<sup>Hi</sup> cells and WT cells, shown by HPA binding and measured by flow cytometry. **b.** A schematic representation of the setup of the *in vivo* experiment with the aim to study the stability of the MGL-L<sup>Hi</sup> phenotype. **c.** Immunofluorescence showing murine MGL2 binding (purple) to tissues with GFP<sup>+</sup> MGL-L<sup>Hi</sup> tumours (green, lower panel) compared to tissues with GFP<sup>+</sup> WT tumours (middle panel). In the GalNAc control (upper panel), MGL2 was pre-incubated with its natural ligand GalNAc to exclude Fc-tail mediated binding.

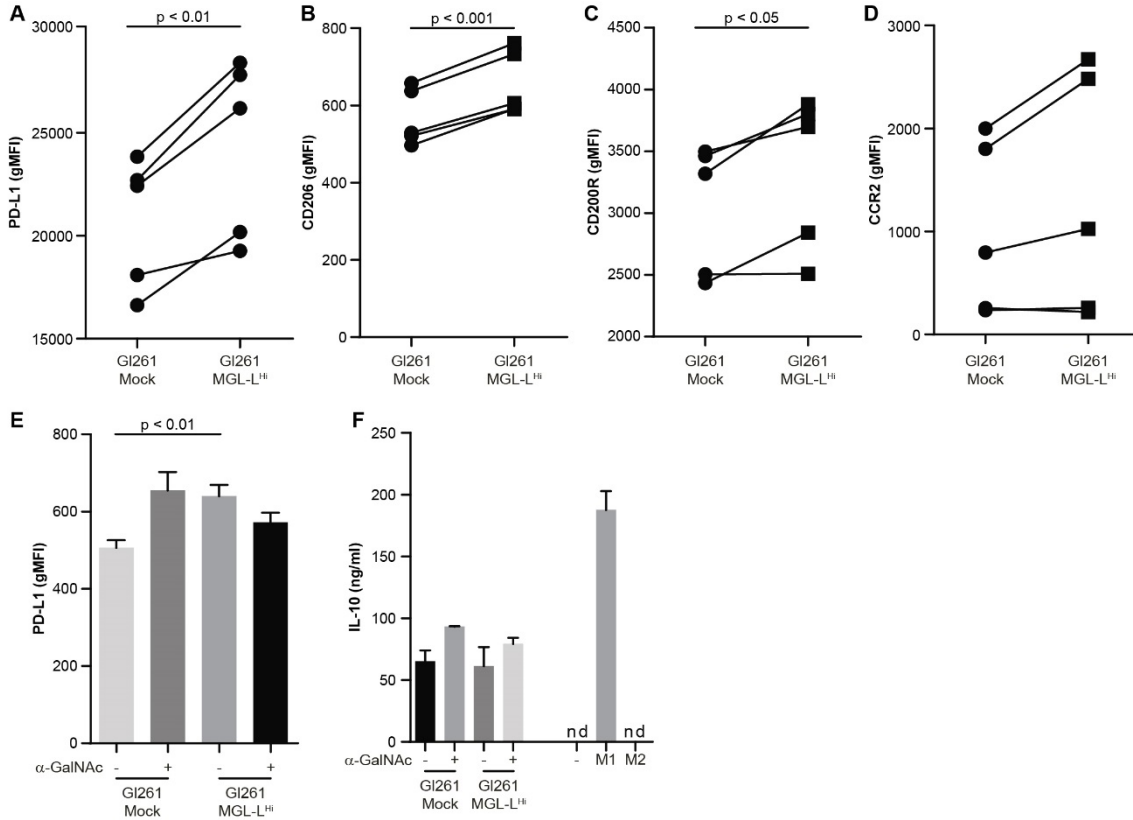

**Fig. S4. *In vitro* effect of the overexpression of glioblastoma MGL-ligands on macrophages and microglia.** Mouse peritoneal macrophages co-incubated with GL261 cells were assayed for the expression of PD-L1 (A), CD206 (B), CD200R (C), and CCR2 (D) by means of flow cytometry. Results indicate that the overexpression of MGL-ligands on the surface of the GL261 induces a significant increase in the expression of M2-like markers such as PD-L1, CD206, and CD200R. Co-incubation of the glioblastoma cell line GL261 with the microglia cell line BV-2 also resulted in an increase in the expression of PD-L1 on microglia (E) and the secretion of IL-10 (F). N=5, paired t-test.

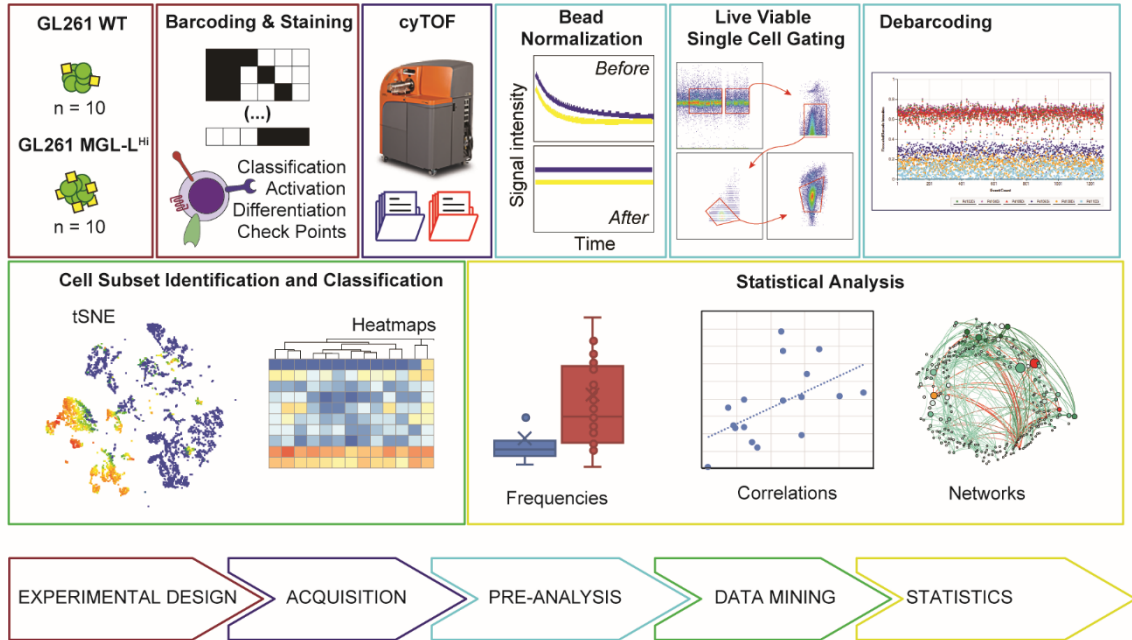

**Fig. S5. Analysis pipeline.** Our analysis pipeline starts with the experimental design including modification of the cell lines, design of the antibody panel, barcoding, and staining, followed by data acquisition on the mass cytometer. The pre-analysis starts with bead normalization, followed by manual gating of viable single cells, which then will be debarcoded. Next, we define cell clusters using HSNE (Cytosplore) and perform statistical analysis and network visualization.

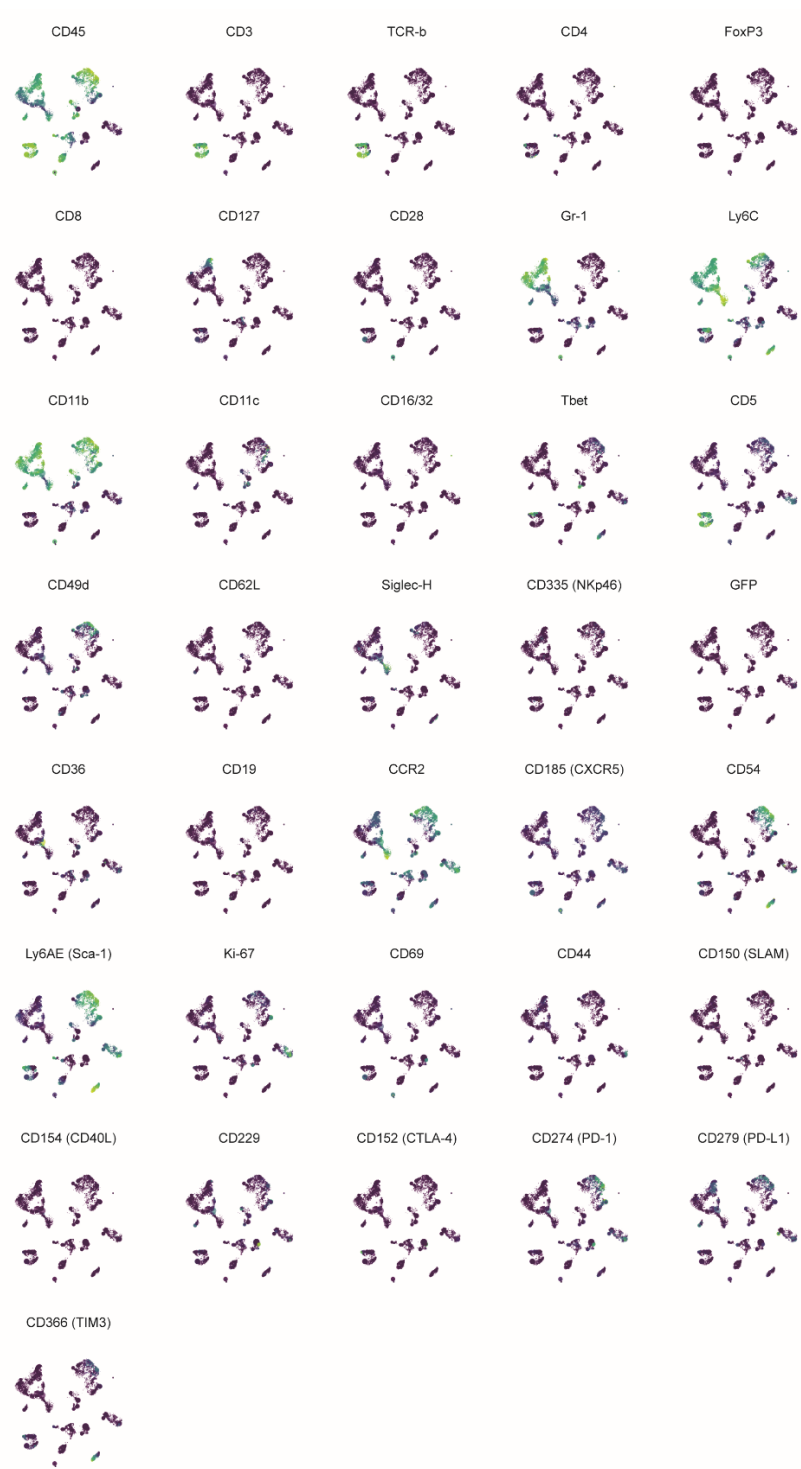

**Fig. S6. HSNE maps for all markers in the first HSNE level.** HSNE maps, colour-coded for all the markers in the CyTOF panel, showing relative expression of the markers.

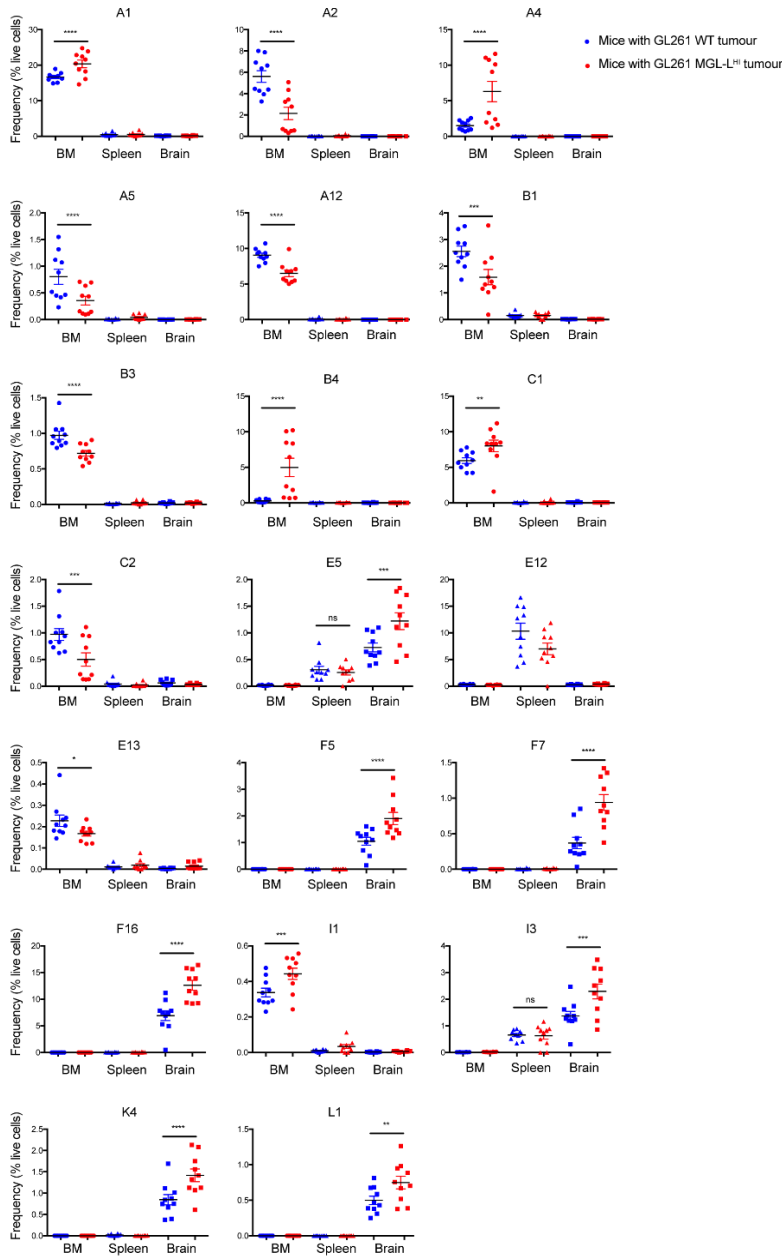

**Fig. S7. Frequencies of clusters that contain statistically significant differences between WT and MGL-L<sup>hi</sup> tumours.** These graphs represent all the clusters with statistically significant differences in clusters between mice with WT or MGL-L<sup>hi</sup> tumours. Differences were assessed with a one-way ANOVA test and post hoc analysis looking at differences between clusters in the same organ, so WT brain versus MGL-L<sup>hi</sup> brain, WT BM versus MGL-L<sup>hi</sup> BM, and WT spleen versus MGL-L<sup>hi</sup> spleen.



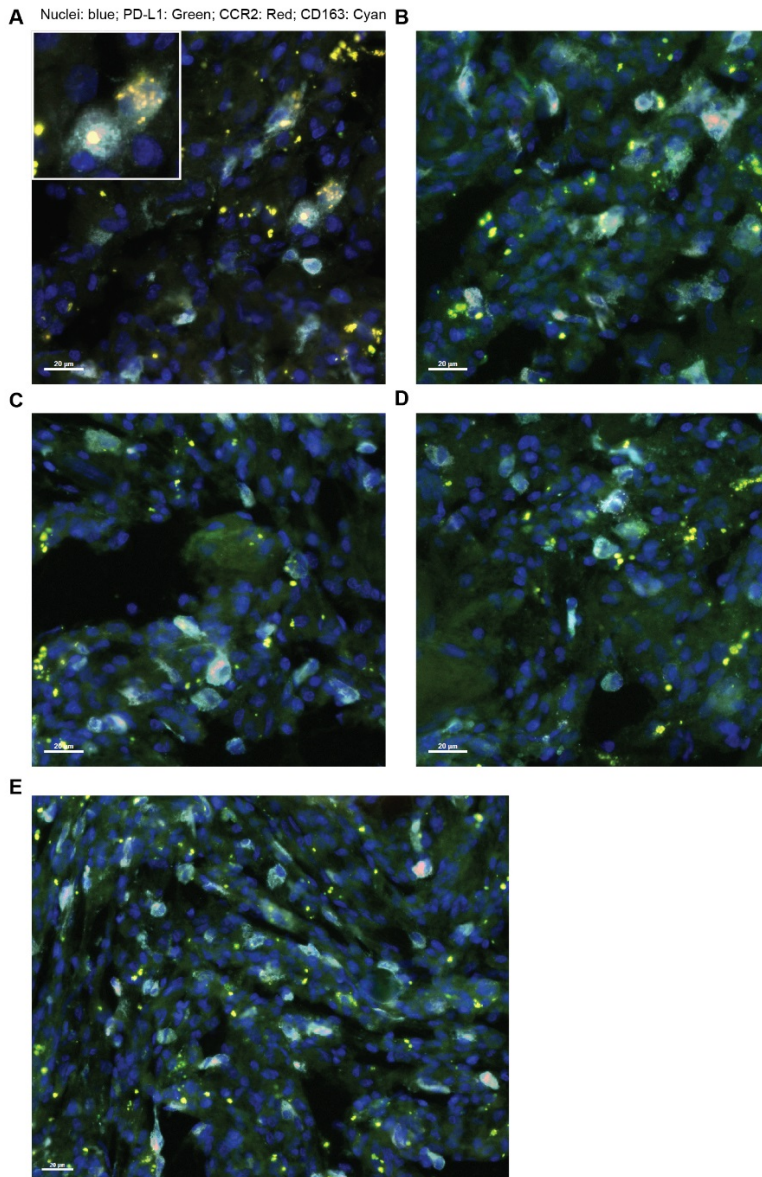

**Fig. S8. Representative micrographs of tissues derived from glioblastoma patients.** Tissues were stained with antibodies against PD-L1 (green), CCR2 (red), and CD163 (cyan). Nuclei were stained using the DNA dye DAPI (blue). A-E represent different fields and magnifications from the same tissue, clearly indicating a colocalization of PD-L1 and CCR2 on CD163<sup>+</sup> cells.

**Table S1. List of 270 glycosylation-related genes.**

|          |           |            |              |         |         |          |            |         |            |         |
|----------|-----------|------------|--------------|---------|---------|----------|------------|---------|------------|---------|
| A4GALT   | B3GAT3    | CHST11     | EXT2         | GALNS   | GFPT1   | HS3ST1   | MAN2B1     | NPL     | SLC35A2    | SULF2   |
| A4GNT    | B3GN-T6   | CHST12     | EXTL1        | GALNT1  | GFPT2   | HS3ST2   | MANBA      | OGT     | SLC35A3    | TSTA3   |
| ABO      | B3GNT1    | CHST13     | EXTL2        | GALNT10 | GLA     | HS3ST3A1 | MFNG       | PAPSS1  | SLC35D1    | UAP1    |
| ALG1     | B3GNT2    | CHST14     | EXTL3        | GALNT11 | GLB1    | HS3ST3B1 | MGAT1      | PAPSS2  | SLC35D2    | UGCG    |
| ALG10    | B3GNT3    | CHST2      | FPGT         | GALNT12 | GLCE    | HS3ST4   | MGAT2      | PGM1    | ST3GAL1    | UGCGL1  |
| ALG10B   | B3GNT4    | CHST3      | FUCA1        | GALNT13 | GMDS    | HS3ST5   | MGAT3      | PIGA    | ST3GAL2    | UGCGL2  |
| ALG11    | B3GNT5    | CHST4      | FUT1         | GALNT14 | GMPPA   | HS3ST6   | MGAT4A     | PIGB    | ST3GAL3    | UGDH    |
| ALG12    | B3GNT7    | CHST5      | FUT10        | GALNT2  | GMPPB   | HS6ST1   | MGAT4B     | PIGC    | ST3GAL4    | UGP2    |
| ALG13    | B3GNT8    | CHST6      | FUT11        | GALNT3  | GNB1    | HS6ST2   | MGAT5      | PIGH    | ST3GAL5    | UGT1A1  |
| ALG14    | B4GALNT1  | CHST7      | FUT2         | GALNT4  | GNB2L1  | HS6ST3   | MGAT5B     | PIGM    | ST3GAL6    | UGT2A1  |
| ALG2     | B4GALNT2  | CHST8      | FUT3         | GALNT5  | GNE     | HYAL1    | MGC4655    | PIGP    | ST6GAL1    | UGT2B10 |
| ALG3     | B4GALNT3  | CHST9      | FUT4         | GALNT6  | GNPDA1  | HYAL2    | MGEA5      | PIGQ    | ST6GAL2    | UGT2B17 |
| ALG5     | B4GALNT4  | CHSY1      | FUT5         | GALNT7  | GNPNAT1 | HYAL3    | MPI        | PMM1    | ST6GALNAC1 | UGT2B28 |
| ALG6     | B4GALT1   | CHSY3      | FUT6         | GALNT8  | GNS     | HYAL4    | NAGK       | PMM2    | ST6GALNAC2 | UGT2B4  |
| ALG8     | B4GALT2   | CMAS       | FUT7         | GALNT9  | GPI     | IDS      | NAGLU      | POFUT1  | ST6GALNAC3 | UGT8    |
| ALG9     | B4GALT3   | CSGALNACT1 | FUT8         | GALNTL1 | GUSB    | IDUA     | NANS       | POFUT2  | ST6GALNAC4 | UST     |
| B3GALNT1 | B4GALT4   | CSGALNACT2 | FUT9         | GALNTL2 | GYLTL1B | KHK      | NDST1      | POMGNT1 | ST6GALNAC5 | UXS1    |
| B3GALNT2 | B4GALT5   | CSGLCA-T   | GAL3ST1      | GALNTL4 | HAS1    | LARGE    | NDST2      | POMT1   | ST6GALNAC6 | WBSCR17 |
| B3GALT1  | B4GALT6   | DAD1       | GAL3ST2      | GALNTL5 | HAS2    | LFNG     | NDST3      | POMT2   | ST8SIA1    | XYLT1   |
| B3GALT2  | B4GALT7   | DDOST      | GAL3ST3      | GALT    | HAS3    | MAN1A1   | NDST4      | RENBP   | ST8SIA2    | XYLT2   |
| B3GALT4  | C1GALT1   | DPAGT1     | GAL3ST4      | GBGT1   | HK1     | MAN1A2   | NEU1       | RFNG    | ST8SIA3    |         |
| B3GALT5  | C1GALT1C1 | DPM1       | GALE         | GCNT1   | HK3     | MAN1B1   | NEU2       | RPN1    | ST8SIA4    |         |
| B3GALT6  | CHPF      | DPM3       | GALK1        | GCNT2   | HPSE    | MAN1C1   | NEU3       | RPN2    | ST8SIA5    |         |
| B3GAT1   | CHST1     | DSEL       | GALK2        | GCNT3   | HPSE2   | MAN2A1   | NEU4       | SGSH    | ST8SIA6    |         |
| B3GAT2   | CHST10    | EXT1       | GALNAC4S-6ST | GCNT4   | HS2ST1  | MAN2A2   | NGALNAC-T2 | SLC35A1 | SULF1      |         |

**Table S2. Summary of antibodies used for CyTOF**

| Target protein             | Clone        | Metal     | Source      | Purpose                                                   |
|----------------------------|--------------|-----------|-------------|-----------------------------------------------------------|
| <b>Cell identification</b> |              |           |             |                                                           |
| Barcodes                   |              | 103-110Pd | Fluidigm    | Staining standardization & doublet discrimination         |
| Iridium                    |              | 191-193Ir | Fluidigm    | Cell identification                                       |
| Cisplatin                  |              | 194-195Pt | Fluidigm    | Live/dead discrimination                                  |
| <b>Cell classification</b> |              |           |             |                                                           |
| CD45                       | 30-F11       | 89Y       | Fluidigm    | All leukocytes                                            |
| CD3e                       | 145-2C11     | 152Sm     | Fluidigm    | T lymphocytes                                             |
| TCRb                       | H57-597      | 169Tm     | Fluidigm    | T a/b lymphocyte receptor                                 |
| CD4                        | RM4-5        | 145Nd     | Fluidigm    | T helper lymphocytes                                      |
| Foxp3 (FJK16s)             | FJK-16s      | 158Gd     | Fluidigm    | Regulatory T lymphocytes                                  |
| CD8a                       | 53-6.7       | 168Er     | Fluidigm    | Cytotoxic T lymphocytes                                   |
| CD127 (IL-7Ra)             | A7R34        | 175Lu     | Fluidigm    | Memory T lymphocytes                                      |
| CD28                       | 37,51        | 151Eu     | Fluidigm    | T lymphocytes, natural killer cells                       |
| Ly-6G/C (Gr-1)             | RB6-8C5      | 141Pr     | Fluidigm    | Granulocytes                                              |
| Ly-6C                      | HK1.4        | 150Nd     | Fluidigm    | Monocytes, macrophages                                    |
| CD11b (Mac-1)              | M1/70        | 148Nd     | Fluidigm    | Macrophages, microglia, dendritic cells, granulocytes     |
| CD11c                      | N418         | 209Bi     | Fluidigm    | Dendritic cells                                           |
| CD16/32                    | 93           | 144Nd     | Biologend   | Monocytes, macrophages                                    |
| Tbet                       | 4B10         | 161Dy     | Fluidigm    | T helper lymphocytes                                      |
| CD5                        | 53-7.3       | 146Nd     | Fluidigm    | Lymphocyte marker                                         |
| CD49d                      | R1-2         | 176Yb     | Biologend   | Exclusion marker for microglia                            |
| F4/80                      | BM8          | 156Gd     | Biologend   | Dendritic cells, macrophages                              |
| CD62L (L-selectin)         | MEL-14       | 160Gd     | Biologend   | T lymphocytes                                             |
| Siglec H                   | 440c         | 166Er     | Genetex     | Plasmacytoid dendritic cells, Microglia                   |
| CD335 (Nkp46)              | 29A1.4       | 153Eu     | Fluidigm    | Natural killer cells                                      |
| aGFP                       | 454505       | 173Yb     | Biologend   | Tumor cells                                               |
| CD36                       | No.72-1      | 147Sm     | Fluidigm    | Monocytes, macrophages, dendritic cells                   |
| CD19                       | 6D5          | 149Sm     | Fluidigm    | B lymphocytes                                             |
| <b>Migration</b>           |              |           |             |                                                           |
| CCR2                       | 475301       | 165Ho     | RnD systems | Monocyte chemotaxis                                       |
| CD185 (CXCR5)              | L138D7       | 142Nd     | Fluidigm    | Lymphocyte chemotaxis                                     |
| CD54 (ICAM-1)              | YN1/1.7.4    | 163Dy     | Fluidigm    | Leukocyte extravasation                                   |
| <b>Activation</b>          |              |           |             |                                                           |
| Ly-6A/E (Sca-1)            | D7           | 164Dy     | Fluidigm    | Hematopoietic stem cell marker/ activation of lymphocytes |
| Ki-67                      | B56          | 172Yb     | Fluidigm    | Cell proliferation                                        |
| CD69                       | H1.2F3       | 143Nd     | Fluidigm    | Activated T lymphocytes                                   |
| CD44                       | IM7          | 171Yb     | Fluidigm    | Activated lymphocytes                                     |
| CD150 (SLAM, IPO-3)        | TC15-12F12.2 | 167Er     | Fluidigm    | Activated lymphocytes and dendritic cells                 |
| CD154 (CD40L)              | MR1          | 170Er     | Fluidigm    | Activated T lymphocytes                                   |
| CD229                      | Ly9ab3       | 174Yb     | Fluidigm    | Activated lymphocytes and myeloid cells                   |
| <b>Immune checkpoints</b>  |              |           |             |                                                           |
| CD152 (CTLA-4)             | UC10-4B9     | 154Sm     | Fluidigm    | Co-inhibitory molecule                                    |
| CD279 (PD-1)               | J43          | 159Tb     | Fluidigm    | Co-inhibitory molecule                                    |
| CD274 (PD-L1)              | 10F.9G2      | 155Gd     | Biologend   | PD1 ligand                                                |
| CD366 (Tim-3)              | RMT3-23      | 162Dy     | Fluidigm    | Co-inhibitory molecule                                    |

## Additional data S1

### Summary according to the Author Checklist: MIFlowCyt-Compliant Items

| Requirement                                            | Please Include Requested Information                                                                                                                                                                                                                                          |
|--------------------------------------------------------|-------------------------------------------------------------------------------------------------------------------------------------------------------------------------------------------------------------------------------------------------------------------------------|
| 1.1. Purpose                                           | Comparison of glioblastoma immune infiltrates and systemic immune status between mice with GL261-WT tumours and GL261-MGL-L <sup>HI</sup> tumours                                                                                                                             |
| 1.2. Keywords                                          | Glioma, MGL, O-linked glycosylation, Tn antigen, Cosmc, C1galt1c1, Immune regulation, macrophages                                                                                                                                                                             |
| 1.3. Experiment variables                              | See antibody list supplementary table 2                                                                                                                                                                                                                                       |
| 1.4. Organization name and address                     | Amsterdam UMC, Vrije Universiteit Amsterdam, Dept. Molecular Cell Biology & Immunology, Amsterdam Infection & Immunity Institute and Cancer Center Amsterdam<br>De Boelelaan 1117, 1081 HZ, Amsterdam, The Netherlands                                                        |
| 1.5. Primary contact and email                         | Dr. Juan J. Garcia Vallejo, E-mail: jj.garciavallejo@amsterdamumc.nl                                                                                                                                                                                                          |
| 1.6. Date/time of experiment                           | October 2017                                                                                                                                                                                                                                                                  |
| 1.7. Conclusions                                       | See main text manuscript                                                                                                                                                                                                                                                      |
| 1.8. Quality control measures                          | See methods manuscript                                                                                                                                                                                                                                                        |
| 2.1.1.1. Sample description                            | Single cell suspensions of brain, spleen and bone marrow                                                                                                                                                                                                                      |
| 2.1.1.2. Source description                            | Mus musculus                                                                                                                                                                                                                                                                  |
| 2.1.1.3. Biological sample source organism description | Taxonomy: mus musculus; Gender: male; Age: 8-14 weeks<br>Phenotype: WT; Treatment: intracranial glioblastoma (GL261) implantation                                                                                                                                             |
| 2.1.2.2. Environmental location                        | N/A                                                                                                                                                                                                                                                                           |
| 2.3. Sample treatment description                      | <i>See methods section of the manuscript</i> 1. Single cell preparation; 2. Cisplatin live/dead staining; 3. Barcoding and fixation; 4. Fc-receptor blocking; 5. Antibody cell surface staining; 6. Permeabilization and intracellular staining; 7. Iridium DNA intercalation |
| 2.4. Fluorescence reagent(s)                           | N/A                                                                                                                                                                                                                                                                           |
| 3.1. Instrument manufacturer                           | Fluidigm                                                                                                                                                                                                                                                                      |
| 3.2. Instrument model                                  | CyTOF 3 HELIOS                                                                                                                                                                                                                                                                |
| 3.3. Instrument config./settings                       | See instrument settings table.                                                                                                                                                                                                                                                |

|                                  |                                                                                                                    |
|----------------------------------|--------------------------------------------------------------------------------------------------------------------|
| 4.1. List-mode data files        | FCS files have been deposited in Cytobank under file “Dusoswa et al. Glioblastomas exploit O-glycosylation – PNAS” |
| 4.2. Compensation description    | N/A                                                                                                                |
| 4.3. Data transformation details | ArcSinH(5)-transformation in Cytobank                                                                              |
| 4.4.1. Gate description          | Live single cells were gated before analysis in Cytosplore                                                         |
| 4.4.2. Gate statistics           | N/A                                                                                                                |
| 4.4.3. Gate boundaries           | N/A                                                                                                                |
